# Supplementary material
Source: ML conference proceedings conference paper supplement (https://openreview.net/forum?id=y9zhXirhCa)
Supplement: supplementary_material [file Supplementary Material.pdf › Supplementary Material.pdf]

## 1 A Additional Experiment

2 **Comparison with the convex relaxation approach using Movielens Data:** We evaluated our  
3 proposed algorithm (Algorithm 1) against the convex relaxation method utilizing the same data  
4 processing method described in Section 6.1 on the Movielens dataset. Similar to the comparison in  
5 Appendix H, where synthetic data was utilized, the convex relaxation approach approximates the  
6 non-convex cost function through trace-norm regularization. Figure 1 indicates that our proposed  
7 algorithm shows fast convergence following the exploration phase and consistently outperforms the  
8 convex relaxation approach, which does not converge. A potential reason for this is that the solution  
9 to the convex relaxed problem need not necessarily be the solution to the actual non-convex problem.  
10 This experiment validates the effectiveness of the proposed approach.

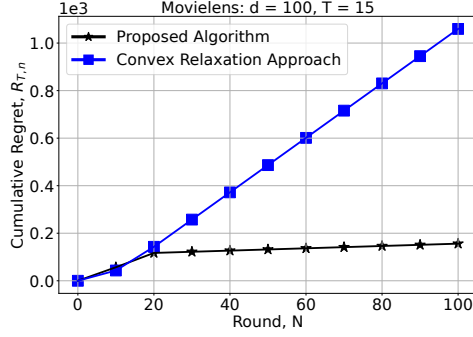

Figure 1: **Comparison with the Convex Relaxation Approach:** Cumulative regret vs. learning round for Movielens data, with parameters set as  $d = 100$ ,  $T = 15$ ,  $r = 1$ ,  $N_1 = 20$ ,  $\sigma^2 = 0.01$ .
